# Supplementary material
Source: Springer Nature journal article supplement (https://www.springermedizin.de/resource/supplementary/12961_2012_264_MOESM8_ESM.pdf/9570920)

**Present and Recommended Response to Disease Burden by Country  
(Bubble Size is TB Incidence)**

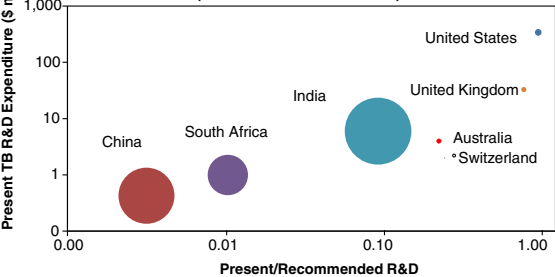

Supplement: MOESM8 [file 9570920]
